# Supplementary material for: Highly sensitive and selective fluorescent chemosensor for Ag+based on a coumarin–Se2N chelating conjugate
Source: Royal Society of Chemistry journal article supplement (doi:10.1039/c0cc04589f), 2010-12-17
Supplement: c0cc04589f.pdf [file c0cc04589f.pdf]

# Highly sensitive and selective turn-on fluorescent chemosensor for Ag<sup>+</sup> based on a coumarin-Se<sub>2</sub>N chelating conjugate

Shanshan Huang,<sup>a</sup> Song He,<sup>a</sup> Yan Lu,<sup>\*a</sup> Fangfang Wei,<sup>a</sup> Xianshun Zeng,<sup>\*a</sup> and Liancheng Zhao<sup>a,b</sup>

<sup>a</sup> Key Laboratory of Display Materials & Photoelectric Devices, Ministry of Education, School of Materials Science & Engineering, Tianjin University of Technology, Tianjin 300384, China..

<sup>b</sup> School of Materials Science and Engineering, Institute of Information Functional Materials & Devices, Harbin Institute of Technology, Harbin 150001, China.

## Materials and methods

### 1. Instruments

All solvents and reagents (analytical grade and spectroscopic grade) were obtained commercially and used as received unless otherwise mentioned. NMR spectra were recorded on a Bruker spectrometer at 400 (<sup>1</sup>H NMR) MHz and 100 (<sup>13</sup>C NMR) MHz. Chemical shifts (δ values) were reported in ppm down field from internal Me<sub>4</sub>Si (<sup>1</sup>H and <sup>13</sup>C NMR). EI mass spectra were recorded on a VG ZAB-HS mass spectrometer (VG, U. K.). Elemental analyses were performed on a Vanio-EL elemental analyzer (Analysensysteme GmbH, Germany). UV absorption spectra were recorded on a UV-3600 UV-VIS spectrophotometer (Shimadzu, Japan). Fluorescence measurements were performed using an F-4600 fluorescence spectrophotometer (Hitachi, Japan) equipped with a plotter unit and a quartz cell (1 cm × 1 cm). Melting points were recorded on a Boetius Block apparatus and are uncorrected.

### 2. Synthesis of SC1

#### Preparation of bis(2-phenylselenoethyl)amine 1

To a 250 reactor, was added 1,2-diphenyldiselenide (6.243 g, 20 mmol), sodium hydroxide (7.429 g, 0.19 mol) and ethanol (150 mL). The suspension was washed with nitrogen flow for 20 min, and then NaBH<sub>4</sub> (1.015 g, 27 mmol) was added in portion. After the addition of NaBH<sub>4</sub>, the solution was stirred for 2 hours until the yellow color disappeared. Then bis(2-chloroethyl)amine (3.57g, 20 mmol) was added in portions.

The resulted solution was stirred at 80 °C for 5 h. The solvent was removed under reduced pressure. The residue was dissolved in CH<sub>2</sub>Cl<sub>2</sub> (50 mL) and water (100 mL). The organic phase was separated and the aqueous phase was extracted with CH<sub>2</sub>Cl<sub>2</sub> (30 mL ×2). The combined organic phase was dried over anhydrous Na<sub>2</sub>SO<sub>4</sub>. After removal of solvent, the residue was purified with column chromatography (SiO<sub>2</sub>, petroleum ether/ethyl acetate, 1:1, v/v). The product was obtained as white powder in 95% yield; mp 54-55 °C; EI MS: m/z [M-H]<sup>+</sup> = 385.1, calcd 384.98; <sup>1</sup>H NMR(CDCl<sub>3</sub>, 400 MHz): 7.53 (d, 4H, *J* = 6.4 Hz), 7.28 (d, 6H, *J* = 5.6 Hz), 3.04 (d, 4H, *J* = 6.6 Hz), 2.89 (d, 4H, *J* = 6.4 Hz), 1.71 (s, 1H); <sup>13</sup>C NMR (CDCl<sub>3</sub>, 400 MHz), 133.07, 129.71, 129.17, 127.12 48.57, 28.747; Anal. Calcd for C<sub>16</sub>H<sub>19</sub>NSe<sub>2</sub>: C 50.14%, H 5.00%, N 3.65%; Found: C 50.39%, H 5.14%, N 3.68%.

### Preparation of the chemosensor SC1

To a 50 mL reactor, was added 7-hydroxy-4-methyl-2H-chromen-2-one (counnarin 4) (0.171 g, 1 mmol), bis(2-(phenylselenenyl)ethyl)amine (0.424 g, 1.1 mmol), formaldehyde (37% , 100 *ul* , 1.23 mmol), glacial acetic acid (5 mL), THF (5 mL) and ethanol (5 mL). The reaction mixture was stirred for 72 h at room temperature. The solvent was removed under reduced pressure. The residue was purified by column chromatography (SiO<sub>2</sub>, petroleum ether/ethyl acetate, 1:1, v/v). The product was obtained as light yellow powder in 58% yield; mp 85-86 °C; ESI MS: m/z [M+H]<sup>+</sup> = 574.03, calcd 574.03. <sup>1</sup>H NMR(CDCl<sub>3</sub>, 400 MHz): 6.81-7.45 (m, 12H), 6.82 (d, 1H, *J* = 7.6 Hz), 6.10 (s, 1H), 4.10 (S, 2H), 2.94-2.98 (m, 4H), 2.86-2.89 (m, 4H), 2.41 (s, 3H); <sup>13</sup>C NMR(CDCl<sub>3</sub>, 400 MHz), 162.13, 161.05, 153.30, 152.40, 152.5, 133.10, 129.26, 128.91, 127.42, 124.93, 113.57, 112.56, 110.91, 108.22, 53.50, 49.88, 23.68, 18.85. Anal. Calcd for C<sub>27</sub>H<sub>27</sub>NO<sub>3</sub>Se<sub>2</sub>: C 56.75%, H 4.76%, N 2.45%. Found: C 56.82%, H 4.85%, N 2.48%.

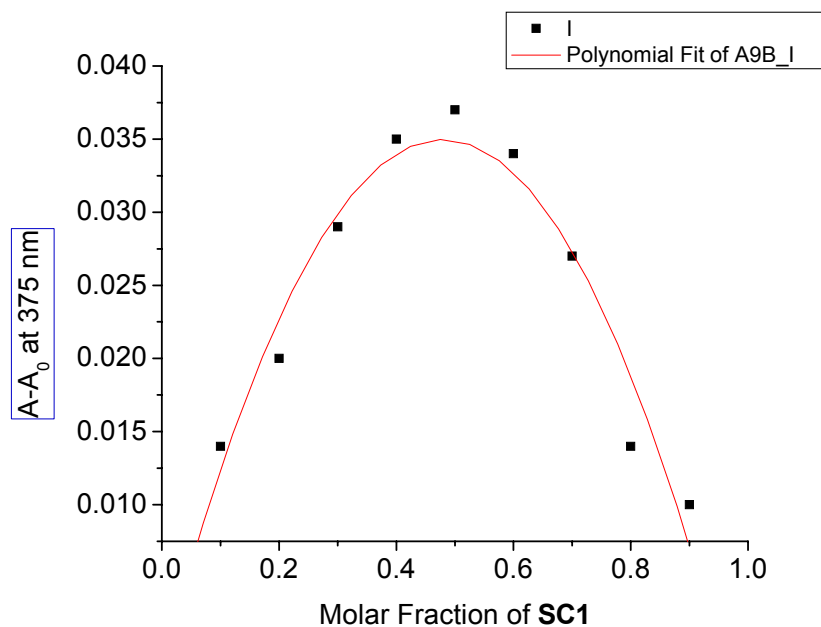

**Figure S1.** Job's plot of a 1:1 complex of **SC1** and  $\text{Ag}^+$  cation.

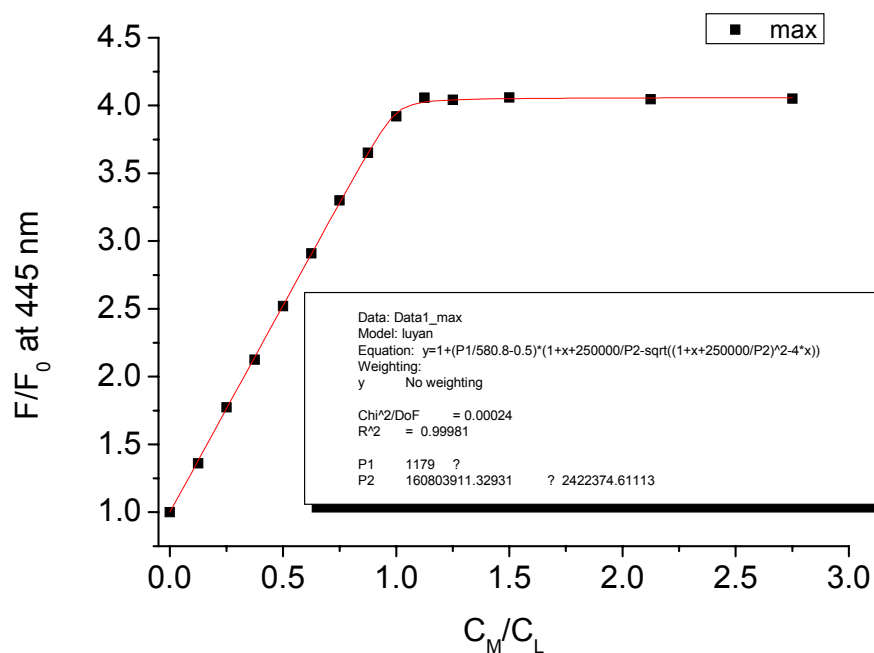

**Figure S2.** A nonlinear least-square analysis of a 1:1 complex of **SC1** and  $\text{Ag}^+$  cation. The nonlinear curve fitness based on 1:1 complex expression:<sup>1</sup>

$$F/F_0 = 1 + (F_{\text{max}}/2F_0 - 1/2) \{ 1 + C_M/C_L + 1/K_S C_L - [(1 + C_M/C_L + 1/K_S C_L)^2 - 4C_M/C_L]^{1/2} \}$$

where  $F$  and  $F_0$  are the fluorescence intensity of **SC1** in the presence and absence of  $\text{Ag}^+$ ,  $C_M$  and  $C_L$  are the concentrations of  $\text{Ag}^+$  and **SC1** (4  $\mu\text{M}$ );  $K_S$  is the stability constant.

<sup>1</sup> (a) K. A. Connors, *Binding Constants, the Measurement of Molecular Complex Stability*; John Wiley & Sons: New York, 1987. (b) B. Valeur, *Molecular Fluorescence Principles and Applications*; Wiley-VCH Verlag GmbH: New York, 2001.

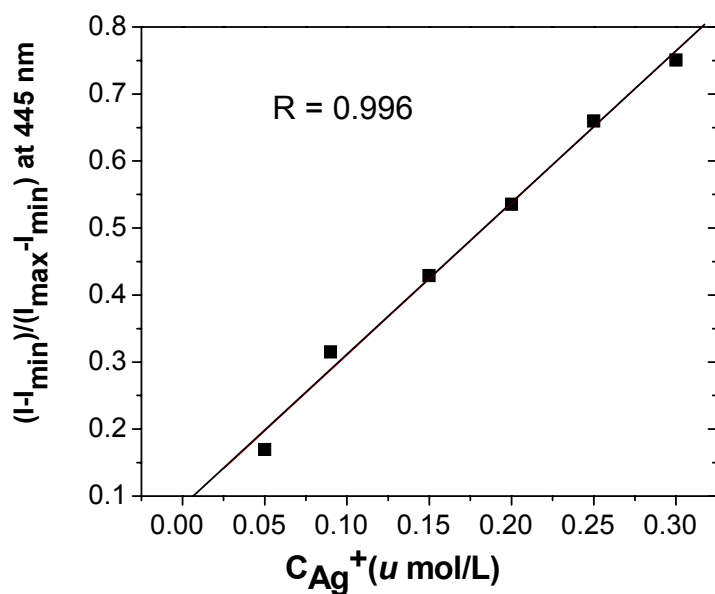

**Figure S3.** Emission (at 445 nm) of SC1 at different concentrations of  $Ag^+$  (0, 0.05, 0.075, 0.15, 0.2, 0.25, 0.30  $\mu\text{M}$ ) added, normalized between the minimum emission (0.0  $\mu\text{M}$   $Ag^+$ ) and the emission at 0.3  $\mu\text{M}$   $Ag^+$ . The detection limit was determined to be  $5.2 \times 10^{-8}$  M.

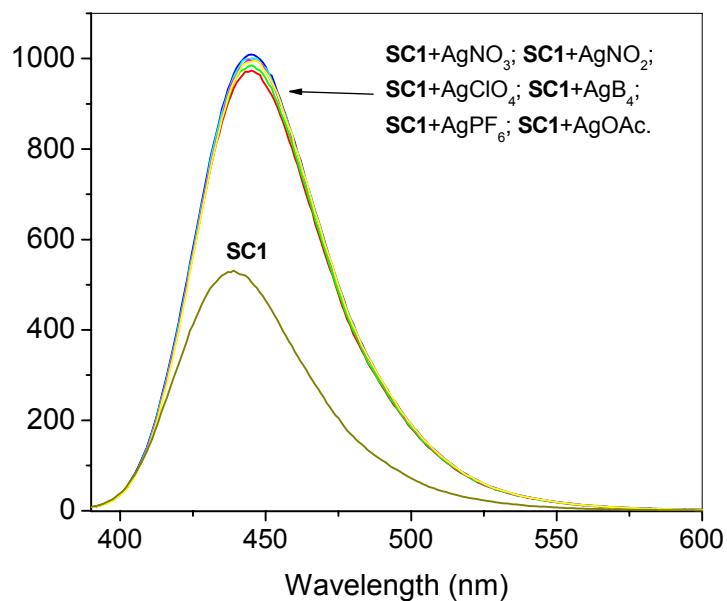

**Figure S4.** The emission spectra of SC1 with  $Ag^+$  salts with different counteranions ( $ClO_4^-$ ,  $NO_2^-$ ,  $PF_6^-$ ,  $AcO^-$  and  $BF_4^-$ ).

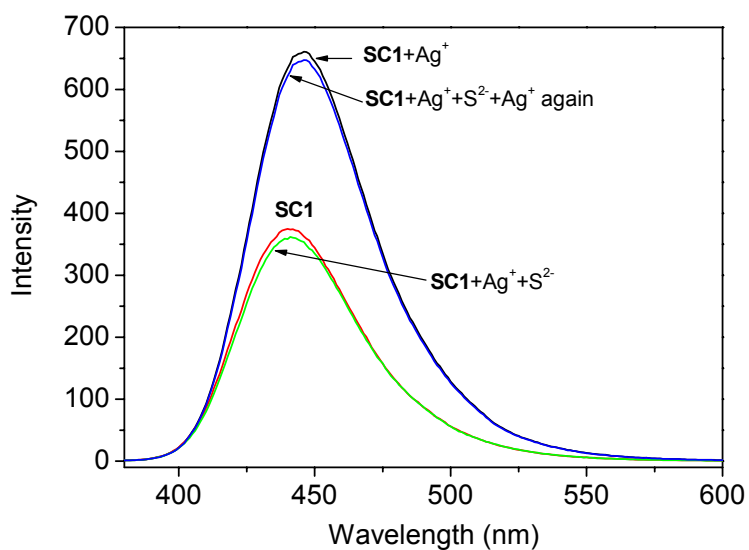

**Figure S5.** Fluorescence spectra of SC1 (5 μM) upon the addition of 0.4 equivalent of AgNO<sub>3</sub> in ethanol/H<sub>2</sub>O (1:1, v/v). Na<sub>2</sub>S (0.2 equiv) was added to SC1+Ag<sup>+</sup> mixture to show the reversible binding nature of Ag<sup>+</sup> with SC1.

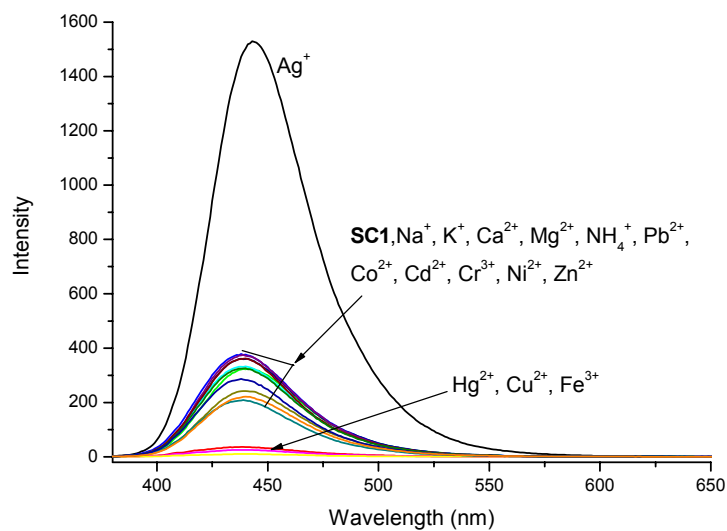

**Figure S6.** Fluorescence spectra of SC1 (4.6 μM) upon the addition of the nitrate salts (50.0 equiv) of Na<sup>+</sup>, K<sup>+</sup>, NH<sub>4</sub><sup>+</sup>, Mg<sup>2+</sup>, Ca<sup>2+</sup>, Pb<sup>2+</sup>, Hg<sup>2+</sup>, Co<sup>2+</sup>, Cd<sup>2+</sup>, Zn<sup>2+</sup>, Ni<sup>2+</sup>, Cu<sup>2+</sup>, Cr<sup>3+</sup>, Fe<sup>3+</sup>, and 2.0 equiv of Ag<sup>+</sup> in ethanol/H<sub>2</sub>O (1:1, v/v).

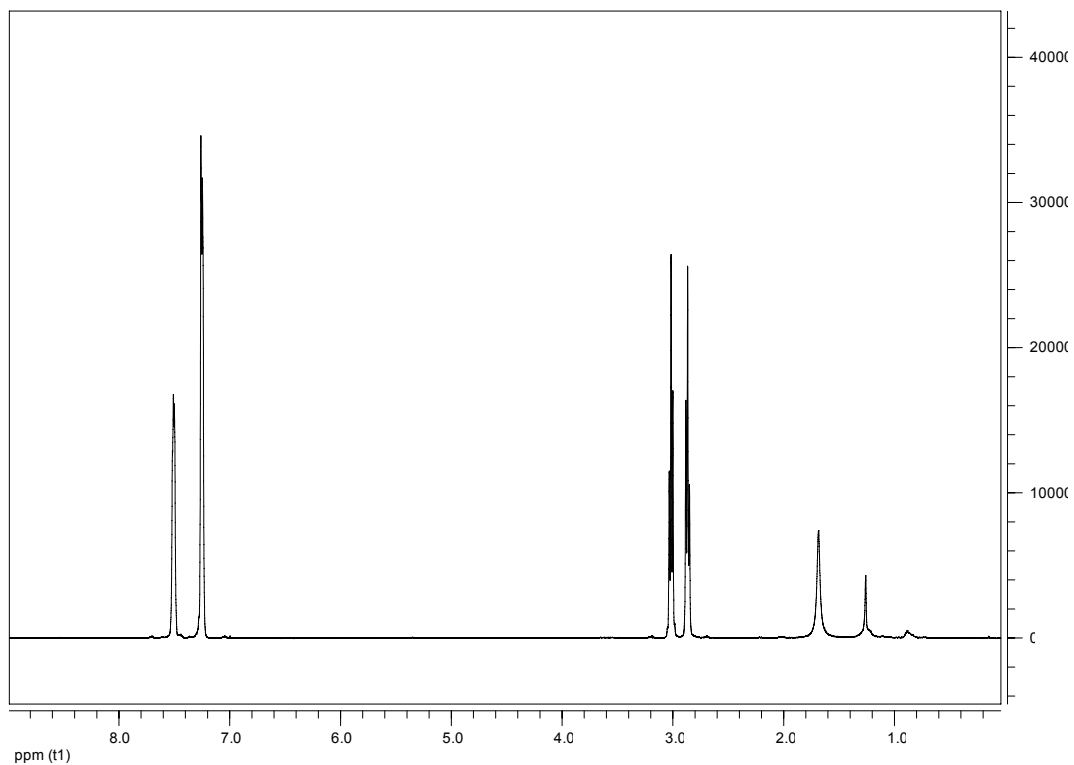

**Figure S7.**  $^1\text{H}$  NMR of compound **1** (400 MHz,  $\text{CDCl}_3$ ).

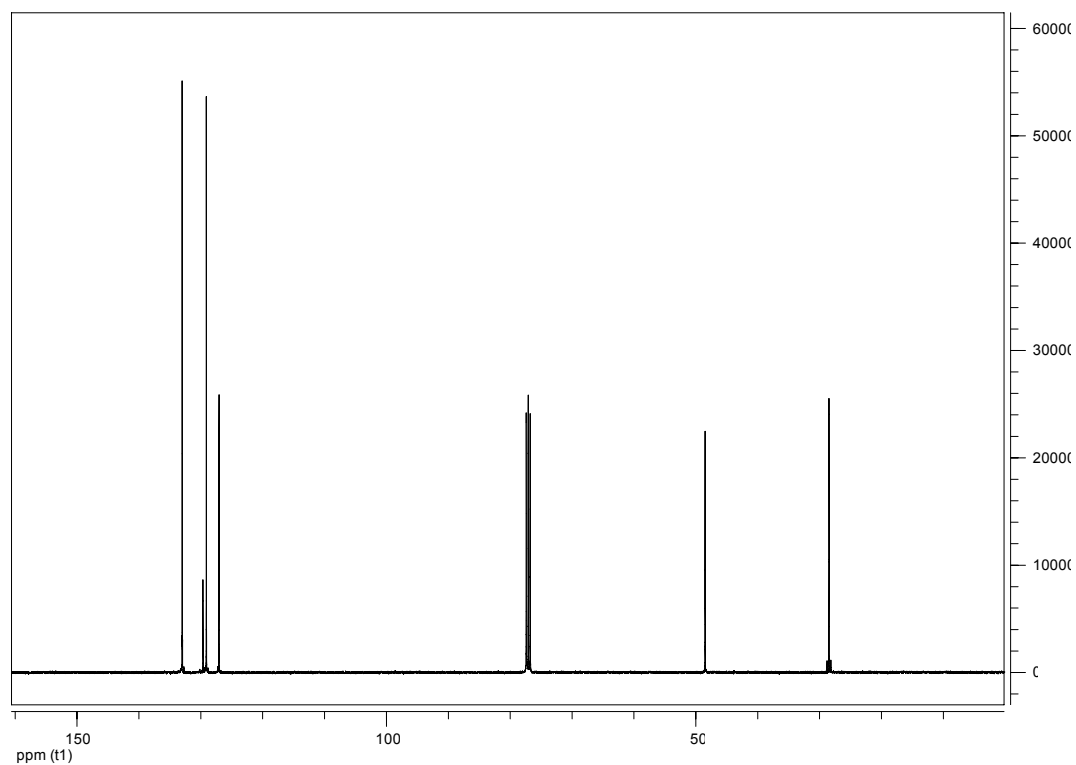

**Figure S8.**  $^{13}\text{C}$  NMR of compound **1** (100 MHz,  $\text{CDCl}_3$ ).

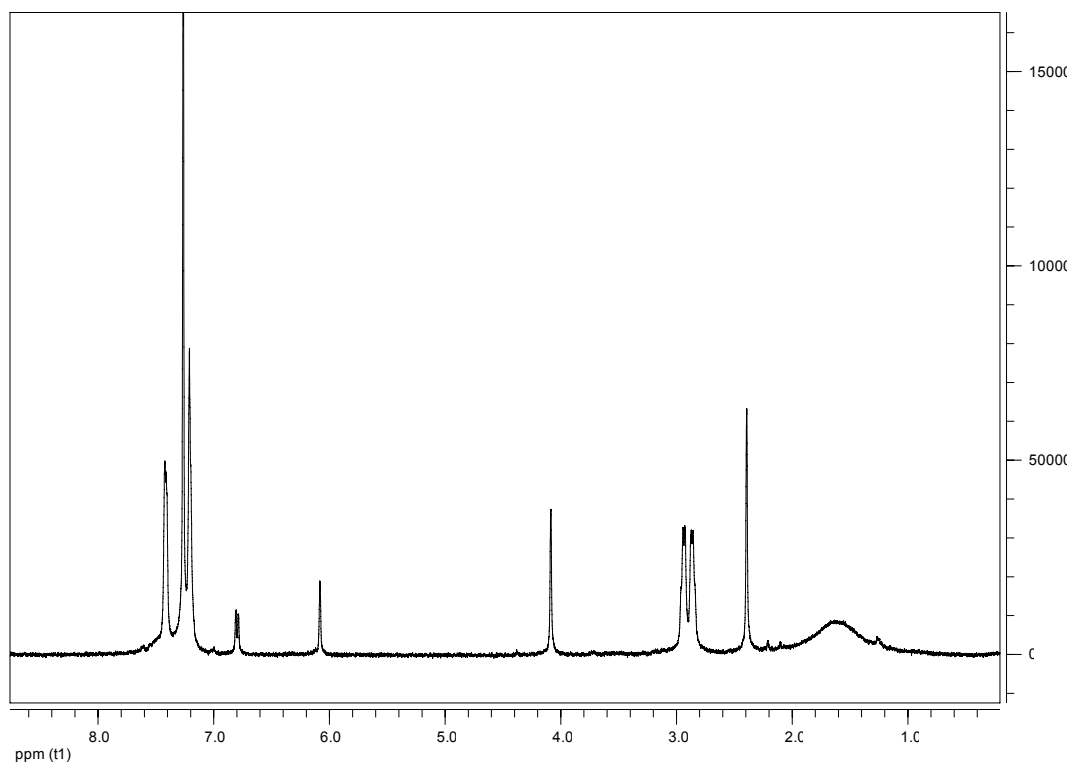

**Figure S9.** <sup>1</sup>H NMR of compound SC1 (400 MHz, CDCl<sub>3</sub>).

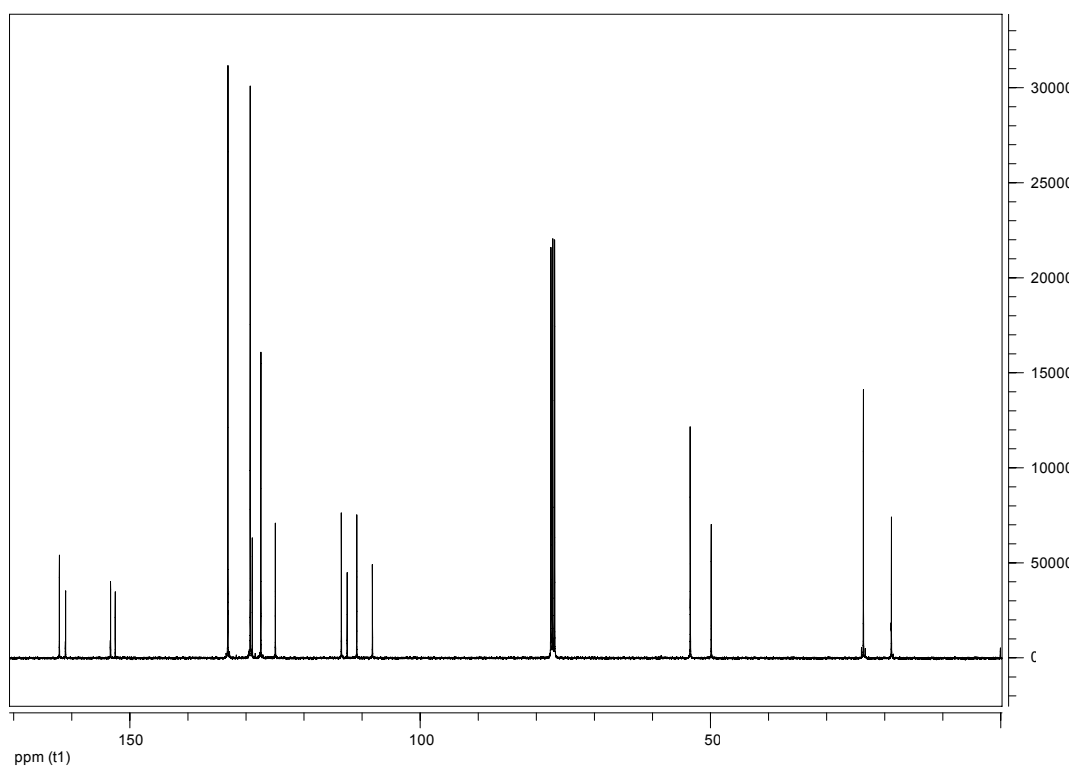

**Figure S10.** <sup>13</sup>C NMR of compound SC1 (100 MHz, CDCl<sub>3</sub>).
